# Supplementary material
Source: PubMed Central journal article supplement (PMC1820729)

Supporting figure 12

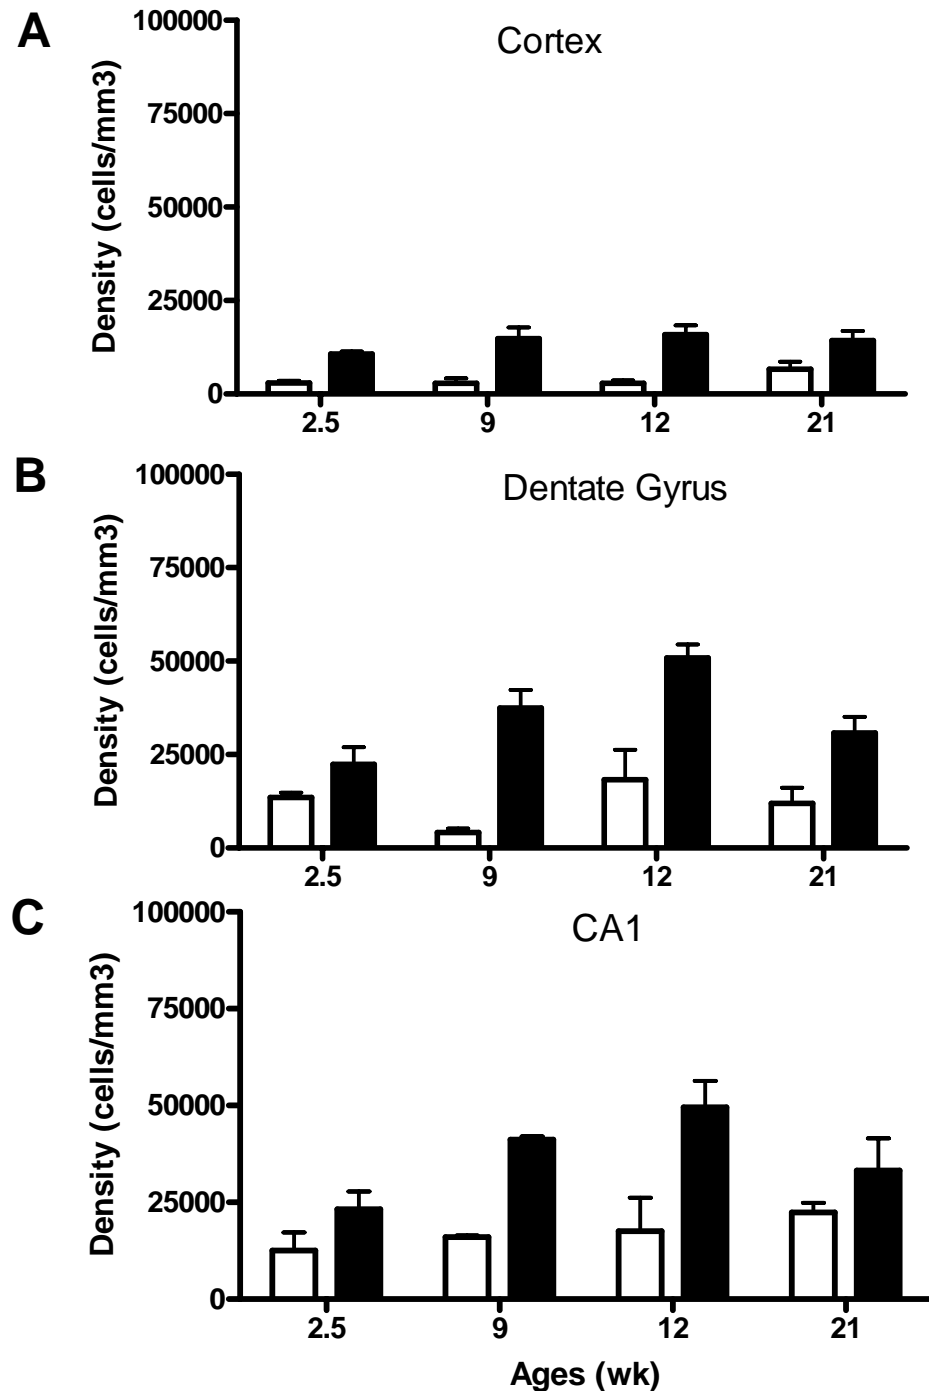

Supplement: pnas_0611625104_1.pdf [file pnas_0611625104_1.pdf]
